# Supplementary material for: ZFP36 stabilizes RIP1 via degradation of XIAP and cIAP2 thereby promoting ripoptosome assembly
Source: PubMed Central journal article supplement (PMC4424499; doi:10.1186/s12885-015-1388-5), 2015-05-06
Supplement: 12885_2015_1388_MOESM1_ESM.pdf [file 12885_2015_1388_MOESM1_ESM.pdf]

**A.**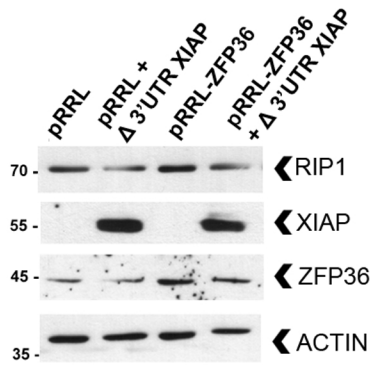**B.**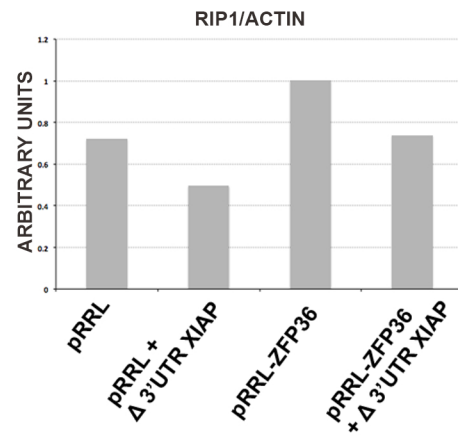

### ZFP36 controls RIP1 stability by regulating IAPs

**A.** RIP1 levels increase following the infection of HEK293 with a lentiviral vector coding for ZFP36 (pRRL-ZFP36). This effect is restrained by the co-transfection of a XIAP construct lacking the 3' UTR (pRRL-ZFP36+ $\Delta$ 3'-UTR XIAP). **B.** Levels of RIP1 normalized over actin for the experiment shown in A.
